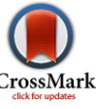

## Retraction

# Retraction: Metabolism of 2-Chloro-4-Nitroaniline via Novel Aerobic Degradation Pathway by *Rhodococcus* sp. Strain MB-P1

## The PLOS ONE Editors

The Council of Scientific and Industrial Research has carried out an investigation about several publications by this group in order to evaluate concerns raised about the authenticity of the data.

The investigation committee at the Council of Scientific and Industrial Research has concluded that there are no data available underlying this study and thus that the published results are fabricated. As a result, the Council of Scientific and Industrial Research has requested the retraction of the publication. The authors are in agreement with the request by the investigation committee.

In line with the outcome of the institutional investigation, *PLOS ONE* retracts this publication.

## Reference

1. Khan F, Pal D, Vikram S, Cameotra SS (2013) Metabolism of 2-Chloro-4-Nitroaniline via Novel Aerobic Degradation Pathway by *Rhodococcus* sp. Strain MB-P1. *PLoS ONE* 8(4): e62178. doi:10.1371/journal.pone.0062178

---

**Citation:** The PLOS ONE Editors (2014) Retraction: Metabolism of 2-Chloro-4-Nitroaniline via Novel Aerobic Degradation Pathway by *Rhodococcus* sp. Strain MB-P1. *PLoS ONE* 9(7): e102862. doi:10.1371/journal.pone.0102862

**Published:** July 9, 2014

**Copyright:** © 2014 The PLOS ONE Editors. This is an open-access article distributed under the terms of the Creative Commons Attribution License, which permits unrestricted use, distribution, and reproduction in any medium, provided the original author and source are credited.
